# Supplementary material for: Novel polymernanowires with triple hydrogen-bonding sites fabricated by metallogel template polymerization and their adsorption of thymidine
Source: Royal Society of Chemistry journal article supplement (doi:10.1039/c0sm00857e), 2010-12-06
Supplement: c0sm00857e.pdf [file c0sm00857e.pdf]

*Supplementary Material for*

## **Novel polymer nanowires with triple hydrogen-bonding sites fabricated by metallogel template polymerization and their adsorption of thymidine**

Botian Li, Liming Tang\*, Lu Qiang, Kai Chen

*Advanced Materials Laboratory, Department of Chemical Engineering, Tsinghua  
University, Beijing 100084, P. R. China*

Regeneration of polymer nanowires with triple hydrogen-bonding sites:

The polymer nanowires which adsorbed thymidine were extracted with ethanol for 12h, and then thymidine molecules were removed thoroughly. The UV-Vis spectra of extract solution at different time are presented in Fig. 1, which indicate the removal of guest molecules.

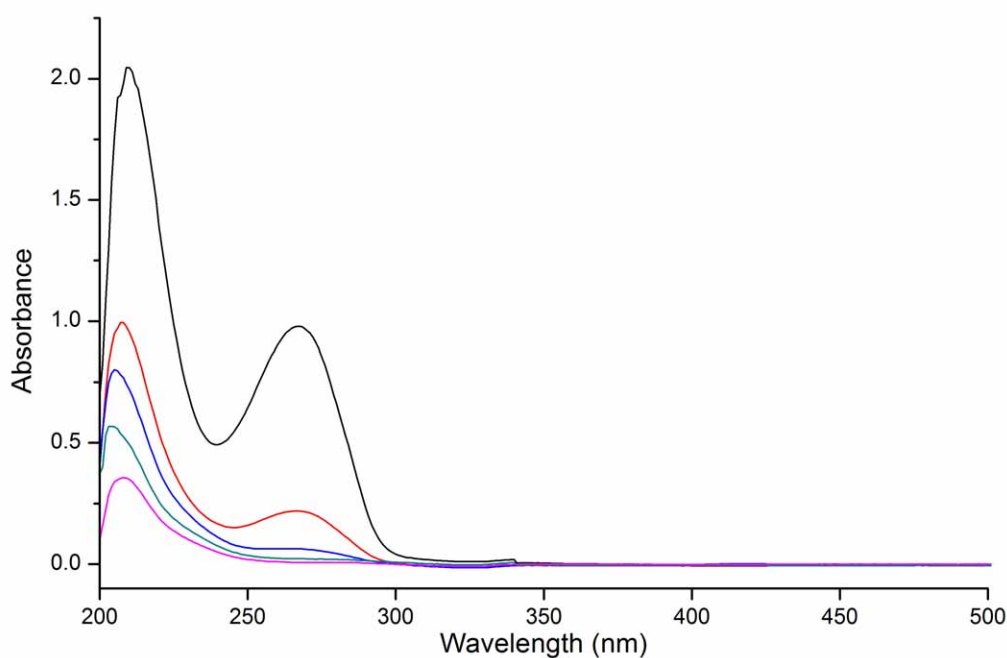

**Fig 1. UV-Vis curves from up to down correspond to the extract solutions at extraction time of 2h, 4h, 6h, 8h, 10h respectively.**
